# Supplementary material for: Reduced neutralization of SARS-CoV-2 B.1.1.7 variant by convalescent and vaccine sera
Source: PubMed Central journal article supplement (PMC7891044; doi:10.1016/j.cell.2021.02.033), 2021-04-15
Supplement: mmc1.pdf [file mmc1.pdf]

## Supplemental information

### Reduced neutralization of SARS-CoV-2

#### B.1.1.7 variant by convalescent and vaccine sera

Piyada Supasa, Daming Zhou, Wanwisa Dejnirattisai, Chang Liu, Alexander J. Mentzer, Helen M. Ginn, Yuguang Zhao, Helen M.E. Duyvesteyn, Rungtiwa Nutalai, Aekkachai Tuekprakhon, Beibei Wang, Guido C. Paesen, Jose Slon-Campos, César López-Camacho, Bassam Hallis, Naomi Coombes, Kevin R. Bewley, Sue Charlton, Thomas S. Walter, Eleanor Barnes, Susanna J. Dunachie, Donal Skelly, Sheila F. Lumley, Natalie Baker, Imam Shaik, Holly E. Humphries, Kerry Godwin, Nick Gent, Alex Sienkiewicz, Christina Dold, Robert Levin, Tao Dong, Andrew J. Pollard, Julian C. Knight, Paul Klenerman, Derrick Crook, Teresa Lambe, Elizabeth Clutterbuck, Sagida Bibi, Amy Flaxman, Mustapha Bittaye, Sandra Belij-Rammerstorfer, Sarah Gilbert, David R. Hall, Mark A. Williams, Neil G. Paterson, William James, Miles W. Carroll, Elizabeth E. Fry, Juthathip Mongkolsapaya, Jingshan Ren, David I. Stuart, and Gavin R. Screaton

**Table S1** X-ray data collection and refinement statistics. Related to STAR Methods X-ray data collection, structure determination and refinement

| <b>Data collection</b>                |                     |                              |
|---------------------------------------|---------------------|------------------------------|
| Data set                              | RBD/Fab269          | RBD <sub>N501Y</sub> /Fab269 |
| Space group                           | C222 <sub>1</sub>   | C2                           |
| Cell dimensions (Å)                   |                     |                              |
| a, b, c (Å)                           | 82.8, 149.7, 145.9  | 195.1, 85.0, 57.9            |
| a, b, g (°)                           | 90, 90, 90          | 90, 100.6, 90                |
| Resolution (Å)                        | 75–1.77 (1.80–1.77) | 96–2.19 (2.23–2.19)          |
| Unique reflections                    | 88349 (4395)        | 48007 (2371)                 |
| R <sub>merge</sub>                    | 0.091 (---)         | 0.177 (---)                  |
| R <sub>pim</sub>                      | 0.025 (0.980)       | 0.050 (0.988)                |
| CC <sub>1/2</sub>                     | 1.00 (0.333)        | 0.997 (0.468)                |
| <I> / <σI>                            | 14.0 (0.3)          | 8.4 (0.2)                    |
| Completeness (%)                      | 100 (95.5)          | 99.9 (98.5)                  |
| Redundancy                            | 13.5 (13.9)         | 13.0 (9.1)                   |
| <b>Refinement</b>                     |                     |                              |
| Resolution (Å)                        | 42.7–1.77           | 56.9–2.19                    |
| No. reflections                       | 83704/4325          | 41325/2137                   |
| R <sub>work</sub> / R <sub>free</sub> | 0.182/0.198         | 0.197/0.222                  |
| No. atoms                             | 5454                | 4948                         |
| Average B-factors (Å <sup>2</sup> )   | 50                  | 68                           |
| R.m.s. deviations                     |                     |                              |
| Bond lengths (Å)                      | 0.009               | 0.003                        |
| Bond angles (°)                       | 1.0                 | 0.6                          |
| Ramachandran plot (%)                 |                     |                              |
| Favoured                              | 96.9                | 96.2                         |
| Allowed                               | 3.1                 | 3.8                          |
| Outliers                              | 0                   | 0                            |

Numbers in brackets refer to the highest resolution shell of data.

**Table S2.** Neutralization and RDB binding of selected antibodies against SARS-CoV-2 strains Victoria and B.1.1.7. Related to STAR Methods Bio-Layer Interferometry and Focus Reduction Neutralization Assay, and Figures 2 and 4.

| mAb       | IC50 (ug/ml) <sup>#</sup> |               |                                     | KD (nM) <sup>€</sup> |             | Immunoglobulin gene usage <sup>Δ</sup> |     |               |
|-----------|---------------------------|---------------|-------------------------------------|----------------------|-------------|----------------------------------------|-----|---------------|
|           | B.1.1.7                   | Victoria      | B.1.1.7/Victoria ratio <sup>§</sup> | RBD-N501Y            | Native RBD  | IGHV                                   | K/λ | IGLV          |
| 40        | 0.035 ± 0.008             | 0.026 ± 0.007 | 1.36                                | 0.97±0.006           | 0.55±0.003  | 3-66                                   | K   | 1-33 or 1D-33 |
| 55        | 0.348 ± 0.044             | 0.095 ± 0.015 | 3.68                                | 4.55±0.19            | 3.61±0.15   | 1-58                                   | K   | 3-20          |
| 58        | 0.116 ± 0.029             | 0.041 ± 0.003 | 2.81                                | 0.55±0.004           | 0.30±0.003  | 3-9                                    | λ   | 3-21          |
| 88        | 0.058 ± 0.008             | 0.033 ± 0.001 | 1.78                                | 0.65±0.005           | 0.64±0.004  | 4-61                                   | λ   | 1-36          |
| 132       | 0.337 ± 0.048             | 0.048 ± 0.000 | 7.03                                | 43.7±0.43            | 16.0±0.09   | 4-34                                   | λ   | 7-46          |
| 150       | 0.139 ± 0.019             | 0.012 ± 0.000 | 11.96                               | 0.72±0.004           | 0.19±0.002  | 3-53                                   | K   | 1-9           |
| 158       | 0.254 ± 0.109             | 0.031 ± 0.004 | 8.33                                | 1.57±0.01            | 0.53±0.0003 | 3-53                                   | K   | 1-9           |
| 159       | 0.061 ± 0.020             | 0.011 ± 0.000 | 5.71                                | N/A                  | N/A         | 3-30                                   | K   | 3-20          |
| 165       | 0.212 ± 0.004             | 0.034 ± 0.004 | 6.31                                | 3.64±0.14            | 3.49±0.15   | 1-58                                   | K   | 3-20          |
| 170       | 0.105 ± 0.050             | 0.025 ± 0.004 | 4.22                                | 8.71±0.13            | 5.75±0.07   | 5-51                                   | K   | 2D-29         |
| 175       | 0.575 ± 0.280             | 0.026 ± 0.000 | 22.51                               | 2.54±0.02            | 0.97±0.005  | 3-53                                   | K   | 1-33 or 1D-33 |
| 222       | 0.014 ± 0.002             | 0.019 ± 0.000 | 0.74                                | 0.39±0.005           | 0.29±0.003  | 3-53                                   | K   | 3-20          |
| 253       | 0.126 ± 0.018             | 0.055 ± 0.008 | 2.28                                | 19.5±0.20            | 13.9±0.48   | 1-58                                   | K   | 3-20          |
| 269       | >10                       | 0.030 ± 0.000 | N/A                                 | 45.4±1.42            | 1.59±0.009  | 3-53                                   | K   | 1-9           |
| 278       | 0.307 ± 0.149             | 0.014 ± 0.007 | 22.46                               | 8.45±0.06            | 5.11±0.03   | 1-18                                   | K   | 1-39 or 1D-39 |
| 281       | 0.012 ± 0.000             | 0.005 ± 0.001 | 2.50                                | 4.05±0.02            | 3.20±0.01   | 3-7                                    | K   | 2-24          |
| 316       | 0.024 ± 0.005             | 0.018 ± 0.007 | 1.37                                | 2.81±0.03            | 1.50±0.01   | 1-2                                    | λ   | 2-8           |
| 318       | 0.185 ± 0.037             | 0.029 ± 0.008 | 6.30                                | 1.99±0.02            | 2.23±0.02   | 1-58                                   | K   | 3-20          |
| 384       | 0.005 ± 0.002             | 0.004 ± 0.001 | 1.13                                | 0.71±0.006           | 0.51±0.004  | 3-11                                   | K   | 1-27          |
| 398       | 0.180 ± 0.001             | 0.091 ± 0.004 | 1.98                                | 1.18±0.009           | 1.02±0.007  | 3-66                                   | λ   | 2-8           |
| REGN10933 | 0.014 ± 0.002             | 0.004 ± 0.002 | 3.31                                | 2.75±0.04            | 1.82±0.03   |                                        |     |               |
| REGN10987 | 0.028 ± 0.003             | 0.032 ± 0.007 | 0.86                                | 3.09±0.06            | 3.85±0.08   |                                        |     |               |
| AZD1061   | 0.012 ± 0.002             | 0.013 ± 0.003 | 0.93                                | 1.41±0.02            | 1.04±0.01   |                                        |     |               |
| AZD8895   | 0.011 ± 0.002             | 0.005 ± 0.001 | 2.17                                | 2.44±0.04            | 1.49±0.02   |                                        |     |               |

# Neutralization activity of selected antibodies against SARS-CoV-2 strain Victoria and B.1.1.7 were determined by FRNT. Data are from 2 independent experiments, each with duplicate wells and the data are shown as mean ± s.e.m.

§ IC50 ratio between strains B.1.1.7 and Victoria.

€ KD values for Fab association with N501-RBD and Y501-RBD measured by BLI are shown mAb 159 binds to the NTD and was not tested.

Δ VH and VL gene usage for monoclonal antibodies.

**Table S3** RBD/Fab complexes analysed for N501 contact. Related to Figures 2 and 3.

| <b>Fabs contact N501 (<math>\leq 4</math> Å)</b> |               | <b>Fabs that do not contact N501 (<math>&gt;4</math> Å)</b> |               |
|--------------------------------------------------|---------------|-------------------------------------------------------------|---------------|
| <b>Name</b>                                      | <b>PDB ID</b> | <b>Name</b>                                                 | <b>PDB ID</b> |
| B38                                              | 7BZ5          | CV07-270                                                    | 6XKP          |
| CC12.1                                           | 6XC3          | P2B-2F6                                                     | 7BWJ          |
| CC12.3                                           | 6XC4          | P2C-1A3                                                     | 7CDJ          |
| BD604                                            | 7CH4          | BD368                                                       | 7CHE          |
| BD629                                            | 7CH5          | P17                                                         | 7CWO          |
| BD236                                            | 7CHB          | COVA2                                                       | 7JMP          |
| COVA2-04                                         | 7JMO          | COVA1                                                       | 7JMW          |
| C102                                             | 7K8M          | 52                                                          | 7KZ9          |
| C1A-B12                                          | 7KfV          | 298                                                         | 7KZ9          |
| C1A-B3                                           | 7KfW          | CR3022                                                      | 6YLA          |
| C1A-C2                                           | 7KfX          | REGN10933                                                   | 6XDG          |
| C1A-F10                                          | 7KfY          | REGN10987                                                   | 6XDG          |
| STE90-C11                                        | 7B3O          | CV30                                                        | 6XE1          |
| Fab-7CJF                                         | 7CJF          | CB6                                                         | 7C01          |
| 40                                               | 7ND3          | P2C-1F11                                                    | 7CDI          |
| 150                                              | 7ND5          | EY6A                                                        | 6ZCZ          |
| 158                                              | 7ND6          | S309                                                        | 7BEP          |
| 269                                              | 7NEH          | 88                                                          | 7BEL          |
|                                                  |               | 253                                                         | 7BEN          |
|                                                  |               | 384                                                         | 7BEP          |
